# Supplementary material for: Development of a new rhodamine-based FRET platform and its application as a Cu2+ probe
Source: Royal Society of Chemistry journal article supplement (doi:10.1039/c4ob00131a), 2014-01-01
Supplement: c4ob00131a1.pdf [file c4ob00131a1.pdf]

*Supporting information for*

**Development of a New rhodamine-based FRET Platform and the  
Applications for Cu<sup>2+</sup> probe**

Xiaoyu Guan, Weiyang Lin,\* Weimin Huang

State Key Laboratory of Chemo/Biosensing and Chemometrics, College of Chemistry  
and Chemical Engineering, Hunan University, Changsha, Hunan 410082, P. R. China

E-mail: [weiyanglin2013@163.com](mailto:weiyanglin2013@163.com)

|                   | Page  |
|-------------------|-------|
| Figure S1-S8..... | S2-S5 |

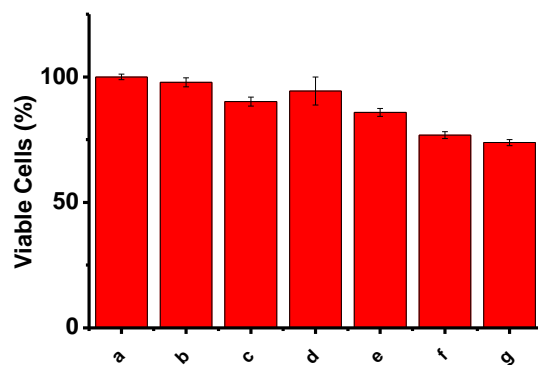

**Fig. S1** Cytotoxicity assays of ratiometric probe **FRET-1** at different concentrations (a: 0  $\mu\text{M}$ ; b: 5  $\mu\text{M}$ ; c: 10  $\mu\text{M}$ ; d: 20  $\mu\text{M}$ ; e: 30  $\mu\text{M}$ ; f: 50  $\mu\text{M}$ ; f: 100  $\mu\text{M}$ ) for MCF-7 cells.

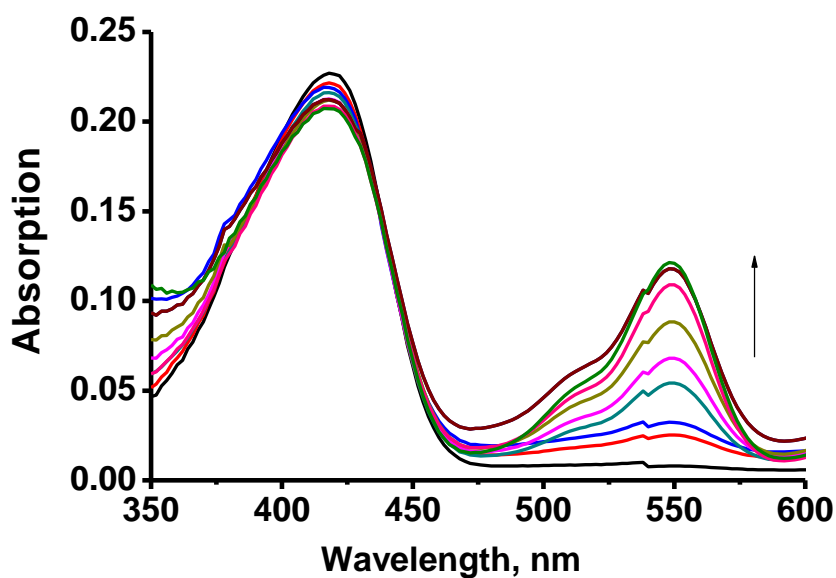

**Fig. S2** Absorption spectral changes of novel ratiometric **FRET-1** (1  $\mu\text{M}$ ) upon addition of  $\text{Cu}^{2+}$  (0- 40 equiv.) in HEPES buffer (pH 7.0, containing 20%  $\text{CH}_3\text{CN}$  as a co-solvent).



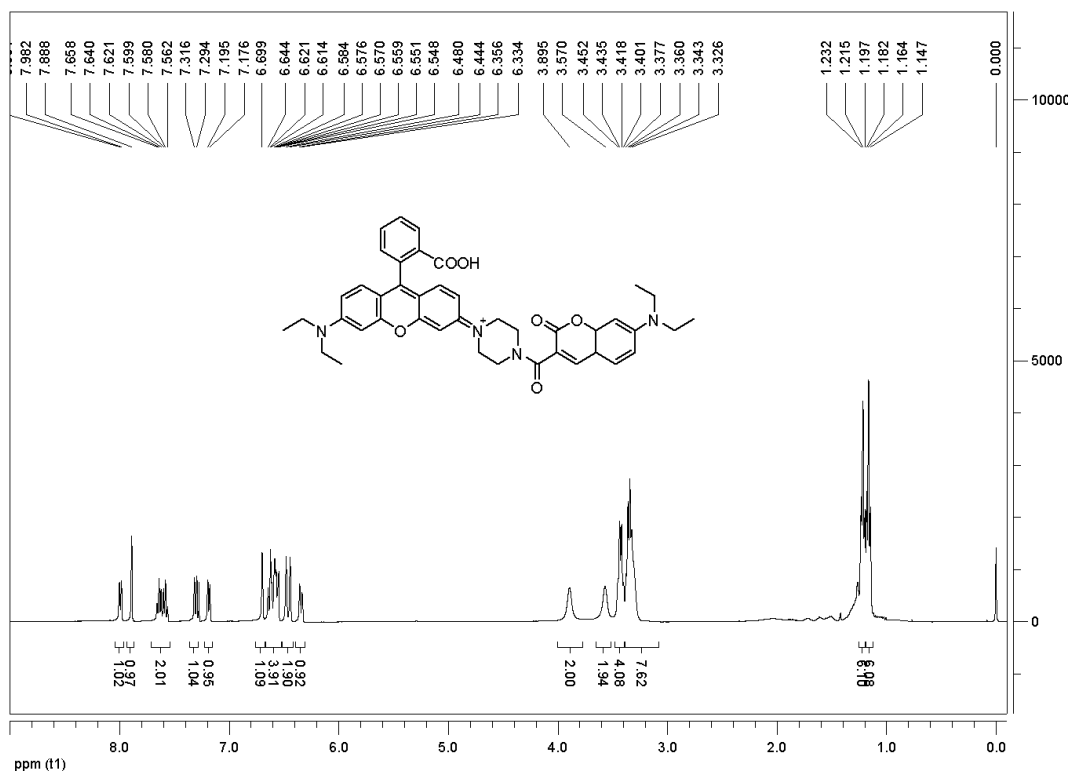

Figure S5. <sup>1</sup>H NMR spectrum of compound FRET-dyad.

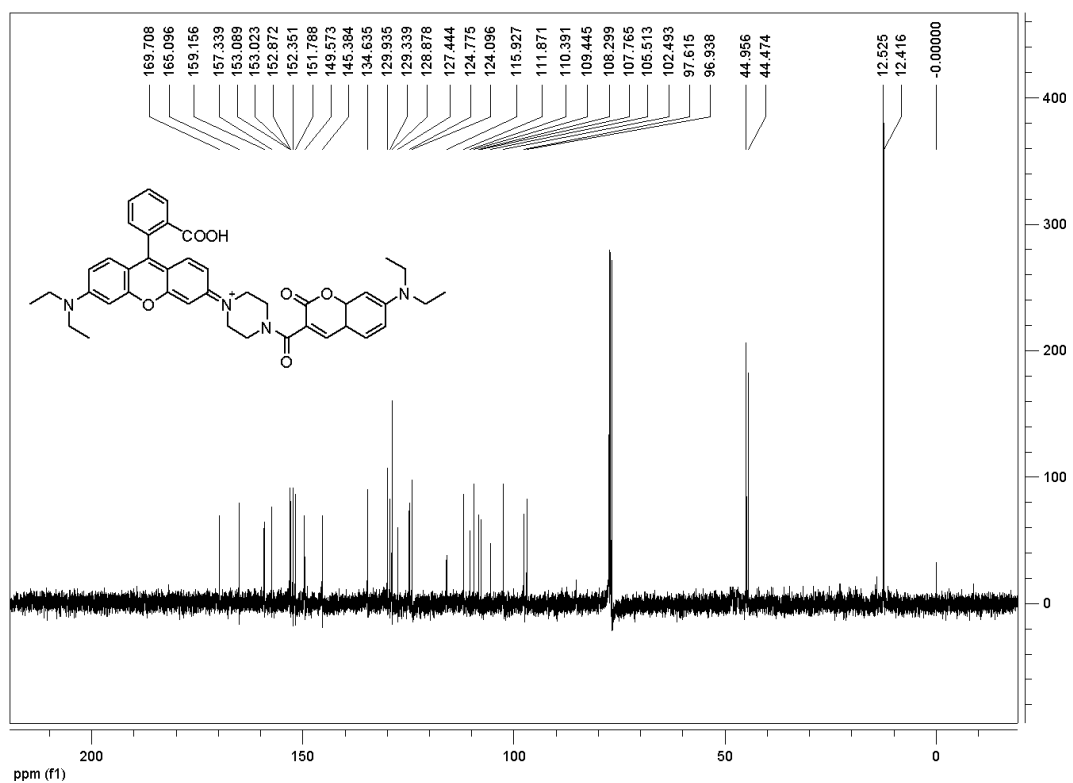

Figure S6. <sup>13</sup>C NMR spectrum of compound FRET-dyad.
